# Supplementary material for: NOTCH2NLC expanded GGC repeats in patients with cerebral small vessel disease
Source: PubMed Central journal article supplement — Stroke Vasc Neurol. 2022 Oct 7;8(2):161–8. doi: 10.1136/svn-2022-001631 (PMC10176980; doi:10.1136/svn-2022-001631), 2022-10-07
Supplement: svn-2022-001631supp001.pdf [file svn-2022-001631supp001.pdf]

**Supplemental Figure 1. Brain magnetic resonance imaging (MRI) T2-weighted fluid-attenuated inversion recovery (T2-FLAIR) images of patients harboring GGC repeat expansions in *NOTCH2NLC*.**

Patient 1

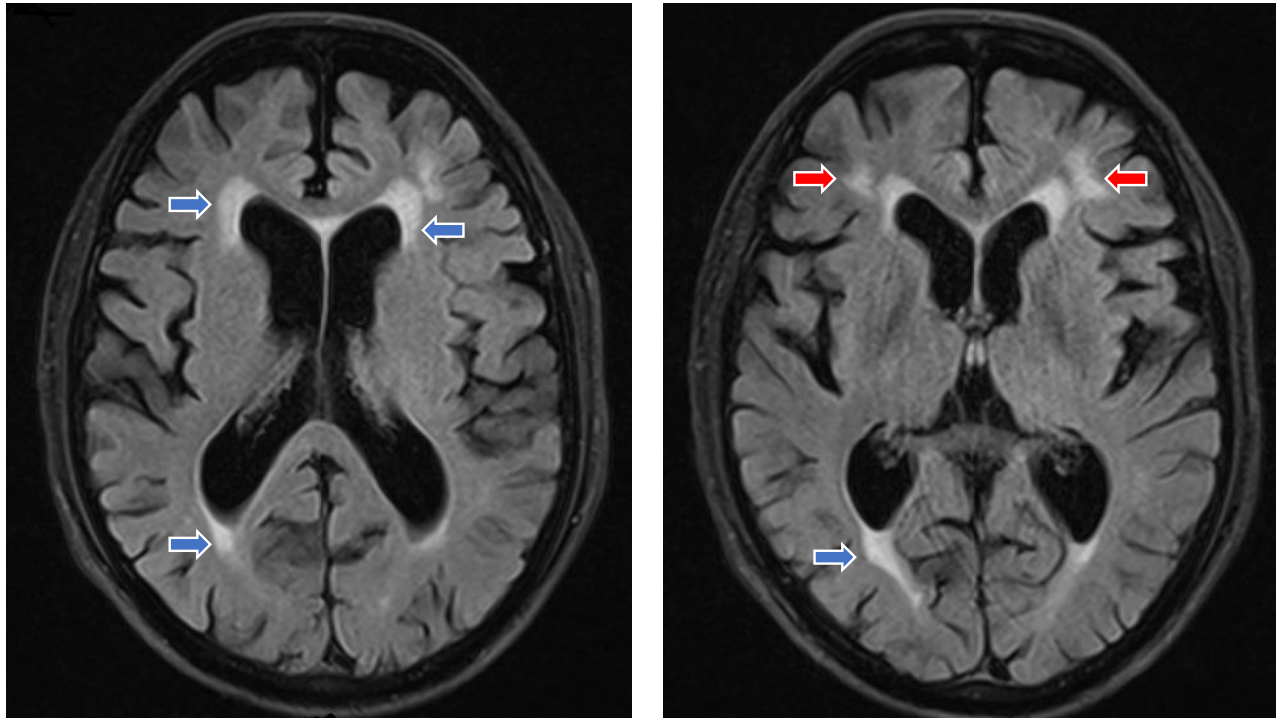

Patient 2

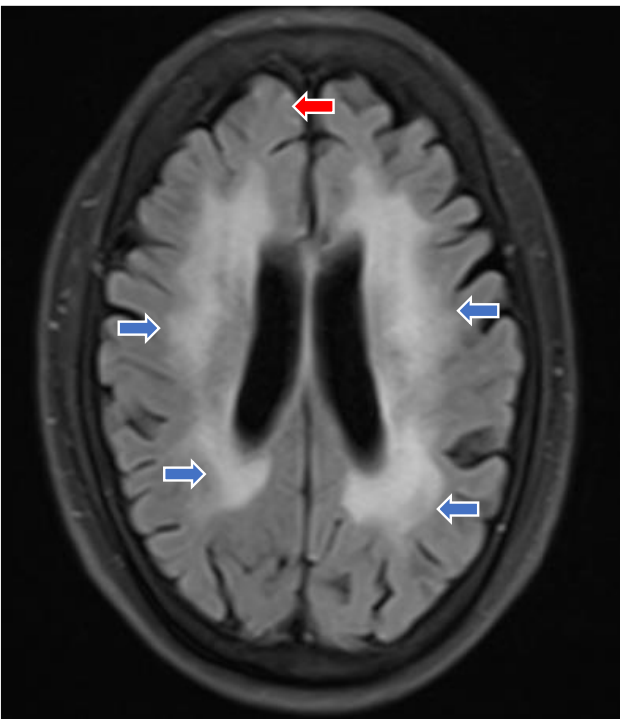

Patient 3

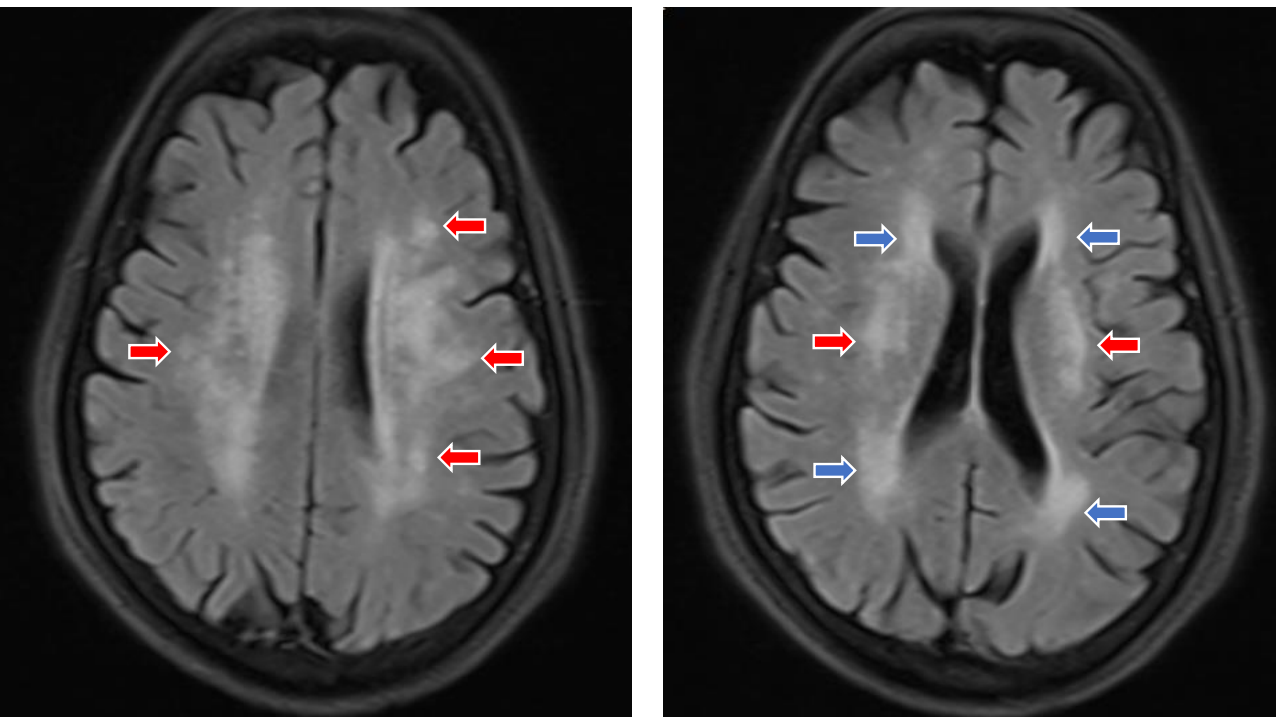

Patient 4

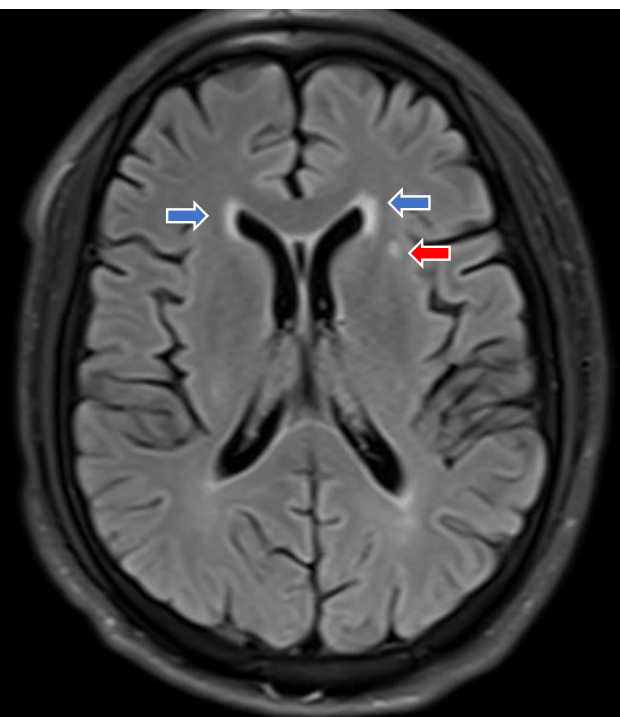

Patient 5

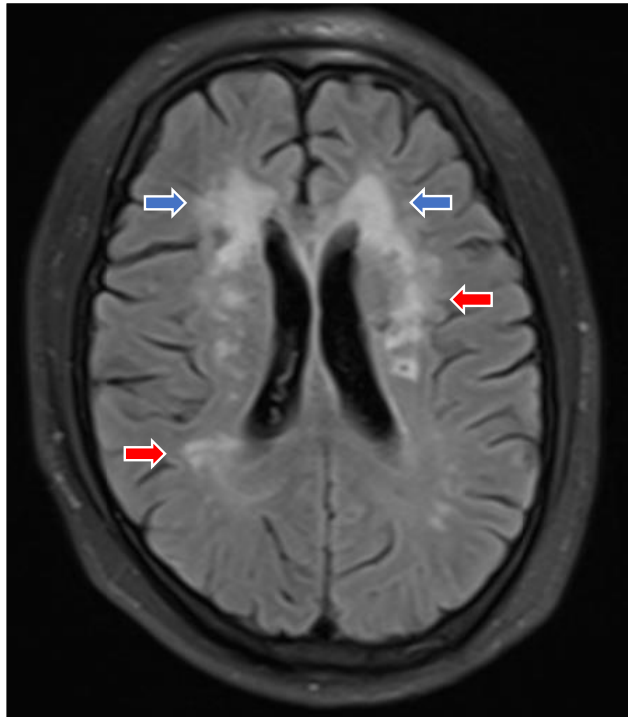

Patient 6

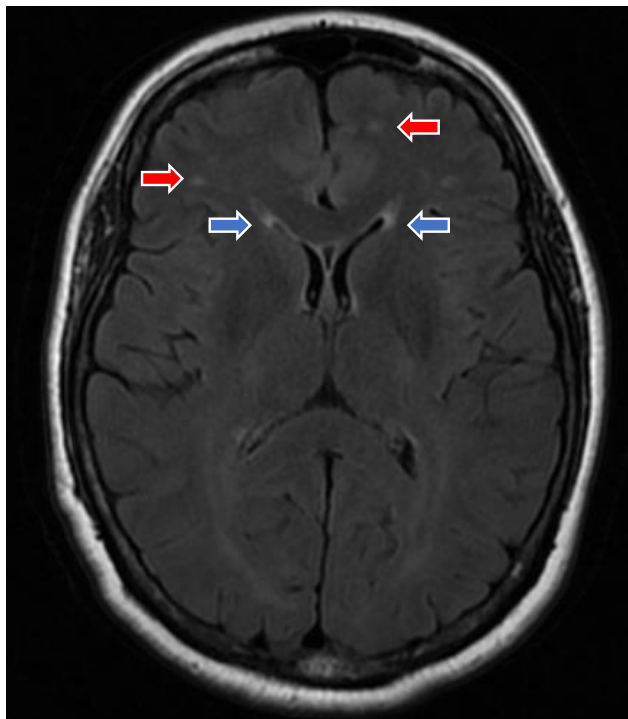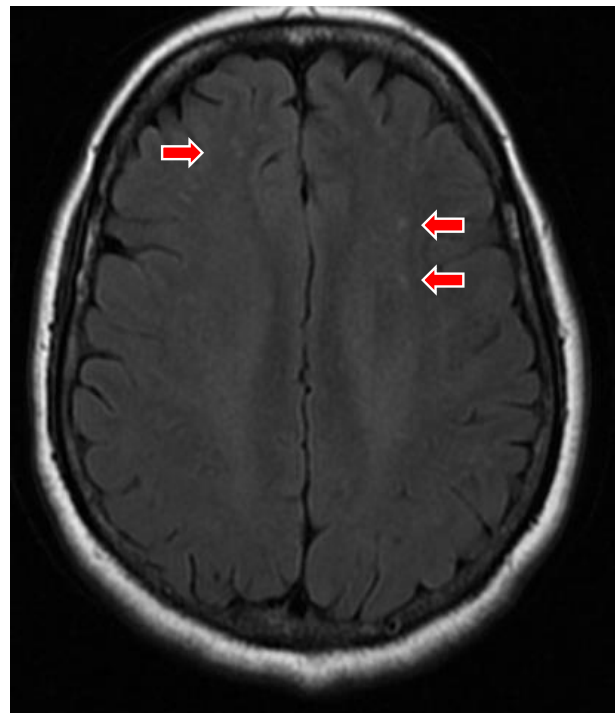

Patient 7

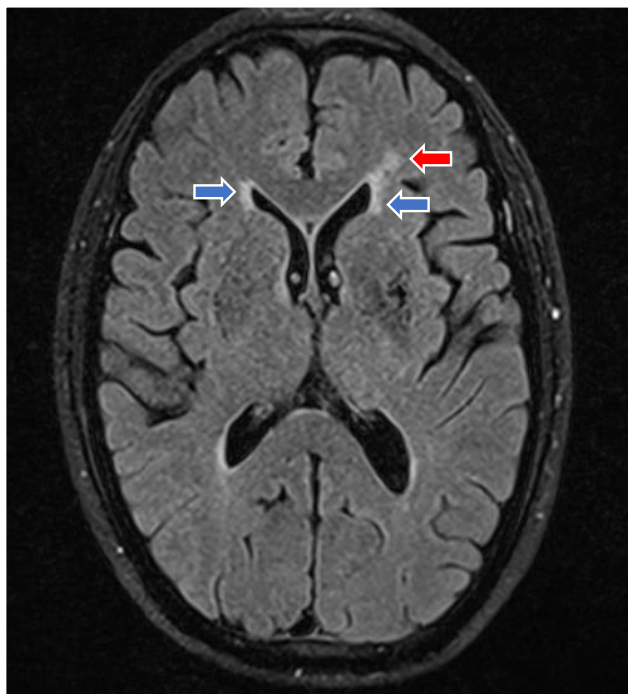

Patient 8

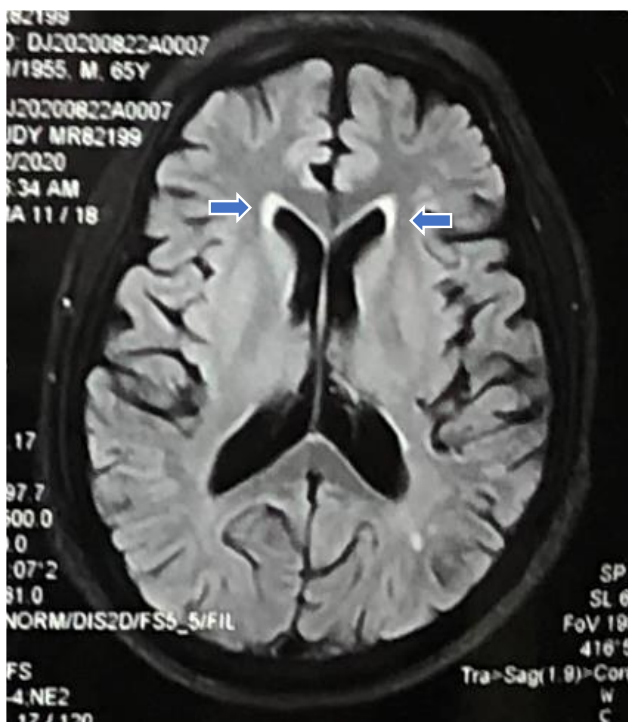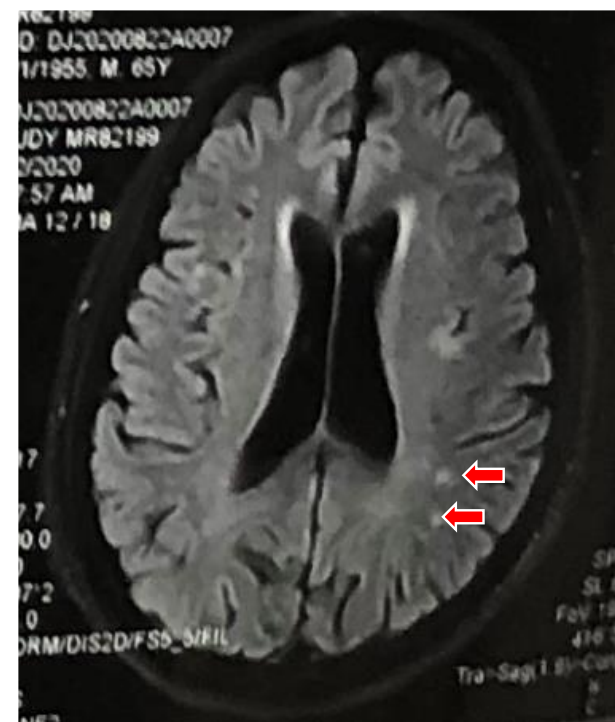

Patient 9

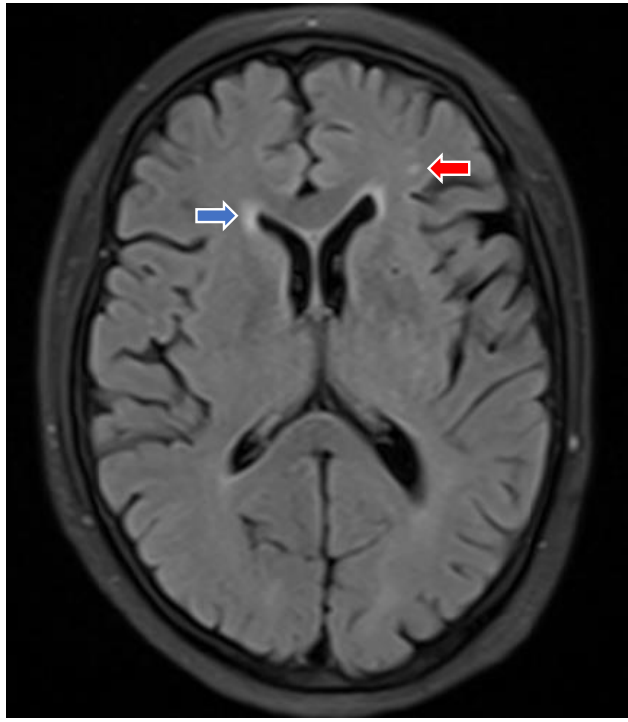

Blue arrow points to periventricular WMH, red arrow points to deep WMH.
