# Supplementary material for: NOTCH2NLC expanded GGC repeats in patients with cerebral small vessel disease
Source: PubMed Central journal article supplement — Stroke Vasc Neurol. 2022 Oct 7;8(2):161–8. doi: 10.1136/svn-2022-001631 (PMC10176980; doi:10.1136/svn-2022-001631), 2022-10-07
Supplement: svn-2022-001631supp002.pdf [file svn-2022-001631supp002.pdf]

**Supplementary table 1. Comparison of demographic, clinical and neuroradiological characteristics between the cerebral small vessel disease patients with Fazekas score  $\geq 5$  and Fazekas score  $\leq 4$  in Patients without GGC repeat expansion.**

| Variables                    | Patients with Fazekas score $\geq 5$ (n=189) | Patients with Fazekas score $\leq 4$ (n=616) | P value  |
|------------------------------|----------------------------------------------|----------------------------------------------|----------|
| Age of onset (year)          | 65.47 $\pm$ 10.24                            | 59.44 $\pm$ 10.08                            | < 0.001* |
| Sex (male)                   | 109 (57.7%)                                  | 318 (51.6%)                                  | 0.145    |
| Muscle weakness              | 69 (36.5%)                                   | 95 (15.4%)                                   | < 0.001* |
| Sensory disturbance          | 13 (6.9%)                                    | 73 (11.9%)                                   | 0.053    |
| Headache                     | 11 (5.8%)                                    | 106 (17.2%)                                  | < 0.001* |
| Dizzy                        | 52 (27.5%)                                   | 290 (47.1%)                                  | < 0.001* |
| Vision blurred               | 5 (2.6%)                                     | 6 (1.0%)                                     | 0.083    |
| Speech impairment            | 20 (10.6%)                                   | 40 (6.5%)                                    | 0.061    |
| Stroke                       | 140 (74.1%)                                  | 149 (24.2%)                                  | < 0.001* |
| Hypertension                 | 161 (85.2%)                                  | 382 (62.0%)                                  | < 0.001* |
| Diabetes Mellitus            | 52 (27.5%)                                   | 106 (17.2%)                                  | 0.002*   |
| Hyperlipemia                 | 27 (14.3%)                                   | 39 (6.3%)                                    | < 0.001* |
| Hyperhomocysteinemia         | 64 (33.9%)                                   | 165 (26.8%)                                  | 0.059    |
| Coronary artery disease      | 13 (6.9%)                                    | 72 (11.7%)                                   | 0.06     |
| Family history/ Stroke       | 25 (13.2%)                                   | 112 (18.2%)                                  | 0.113    |
| White matter hyperintensity  | 189 (100.0%)                                 | 616 (100.0%)                                 | NA       |
| Lacunar Infarcts             | 156 (82.5%)                                  | 428 (69.5%)                                  | < 0.001* |
| Enlarged Perivascular Spaces | 124 (65.6%)                                  | 382 (62.0%)                                  | 0.371    |
| Brain Atrophy                | 23 (12.2%)                                   | 52 (8.4%)                                    | 0.123    |

NA, not available. Data represents the mean  $\pm$  SD or the number (%) of subjects. For the measurement data that conform to the normal distribution, use the independent sample t test; for the measurement data that does not conform to the normal distribution, use the Mann-Whitney U test; For qualitative dichotomous variables, used Pearson's chi-square test.  $P < 0.05$  was considered statistically significant, \* represents significant.
